# Supplementary material
Source: MDPI journal article supplement (https://www.mdpi.com/2076-3417/8/10/1742)
Supplement: s1 [file s1]

# Hybridization of Layered Iron Hydroxide Nanoclays and Conducting Polymer for Controlled Oxygen Scavenger

Hyoung-Jun Kim, Tae-Hyun Kim, Jin Kuen Park and Jae-Min Oh

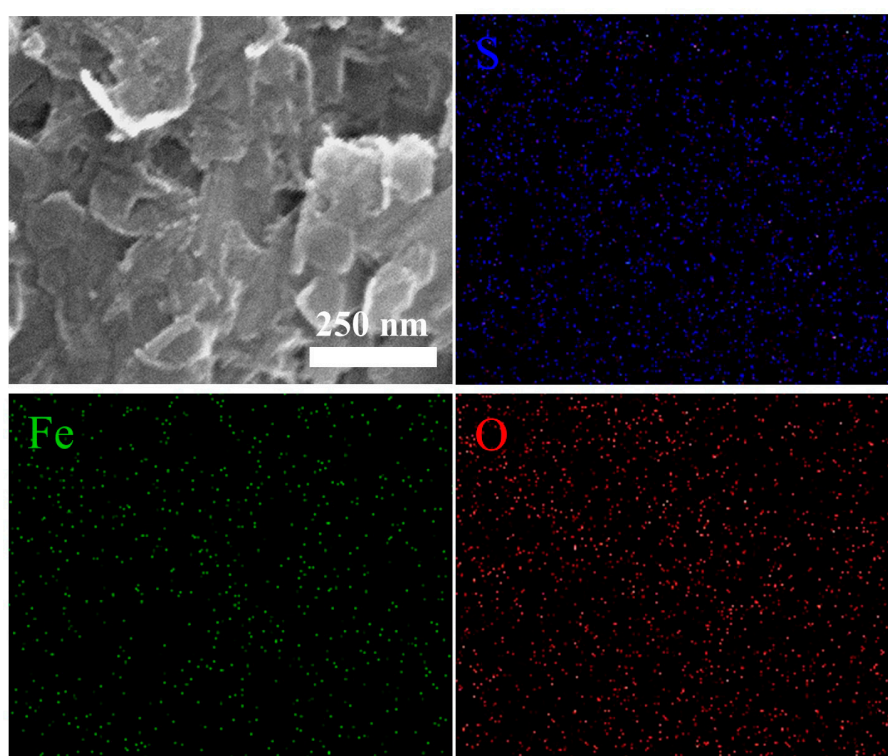

**Figure S1.** Scanning electron microscopic images and energy dispersive spectroscopy mapping images of GR-SO<sub>4</sub>.

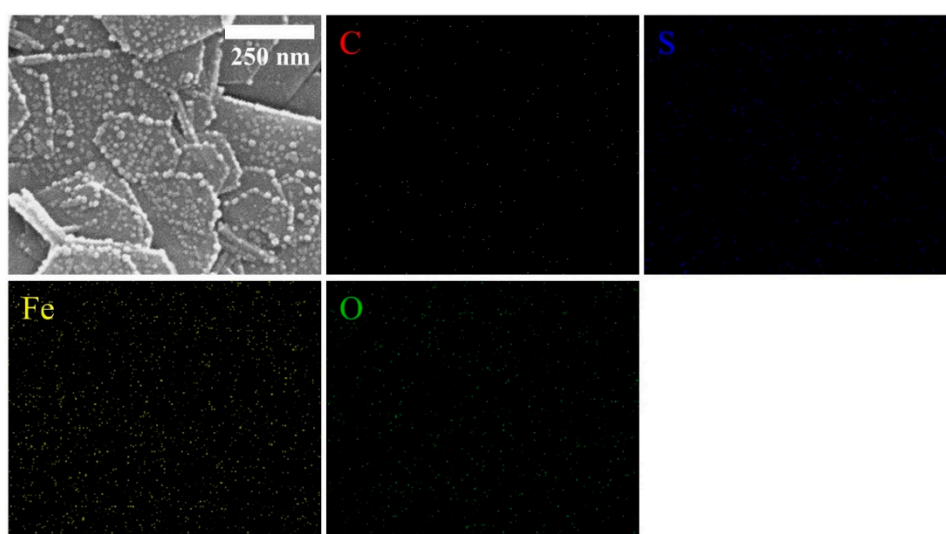

**Figure S2.** Scanning electron microscopic images and energy dispersive spectroscopy mapping images of GR-PEDOT.
